# Supplementary material
Source: Springer Nature journal article supplement (https://www.springermedizin.de/resource/supplementary/13256_2007_422_MOESM1_ESM.pdf/9645946)

**A**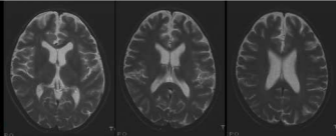**B**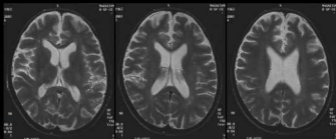**C**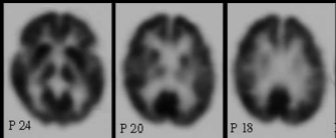

Supplement: MOESM1 [file 9645946]
